# Supplementary material for: Hierarchical donut-shaped LiMn2O4as an advanced cathode material for lithium-ion batteries with excellent rate capability and long cycle life
Source: Royal Society of Chemistry journal article supplement (doi:10.1039/c5ta00752f), 2015-01-01

Electronic supplementary information for

**Hierarchical donut-shaped LiMn<sub>2</sub>O<sub>4</sub> as advanced cathode material for lithium-ion batteries with excellent rate capability and long cycle life†**

**Weiwei Sun,<sup>‡a</sup> Huiqin Liu,<sup>‡a</sup> Tao Peng,<sup>a</sup> Yumin Liu,<sup>b</sup> Gongxun Bai,<sup>c</sup> Sen Kong,<sup>a</sup> Shishang Guo,<sup>a,\*</sup> Meiya Li<sup>a,\*</sup> and Xing-Zhong Zhao<sup>a,\*</sup>**

*<sup>a</sup> Key Laboratory of Artificial Micro/Nano-Structures of Ministry of Education  
School of Physical Science and Technology, Wuhan University  
Wuhan 430072, Hubei, PR China*

*E-mail: [gssyhx@whu.edu.cn](mailto:gssyhx@whu.edu.cn)*

*[myli@whu.edu.cn](mailto:myli@whu.edu.cn)*

*[xzzhao@whu.edu.cn](mailto:xzzhao@whu.edu.cn)*

*<sup>b</sup> Institute for Interdisciplinary Research (IIR), Jiangnan University  
Wuhan 430056, Hubei, PR China*

*<sup>c</sup> Department of Applied Physics, The Hong Kong Polytechnic University,  
Hong Kong, China.*

*† These authors contributed equally to the work.*

Fig. S1 N<sub>2</sub> adsorption-desorption isotherms of the DS-LMO. The inset shows the BJH pore-size distribution of the DS-LMO.

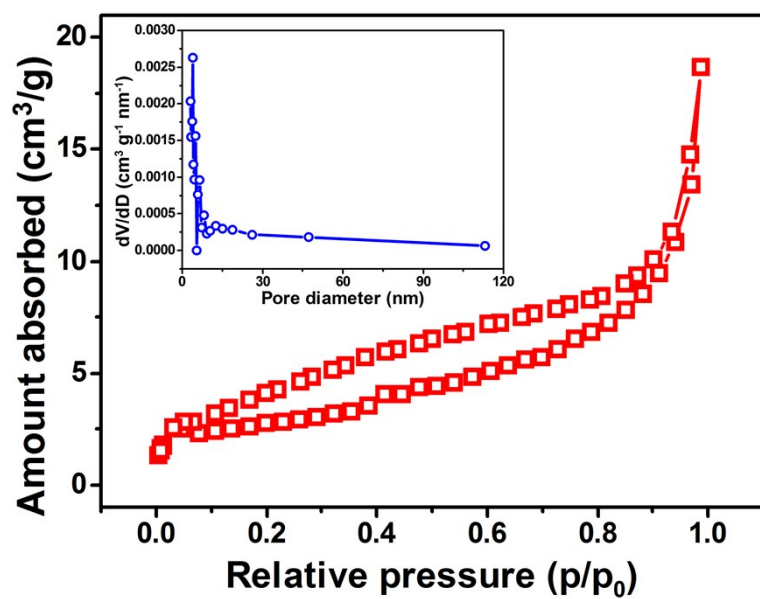

**Fig. S2** The first charge/discharge profiles of DS-LMO at C/2 (the inset is CV plot at 0.05 mV s<sup>-1</sup>).

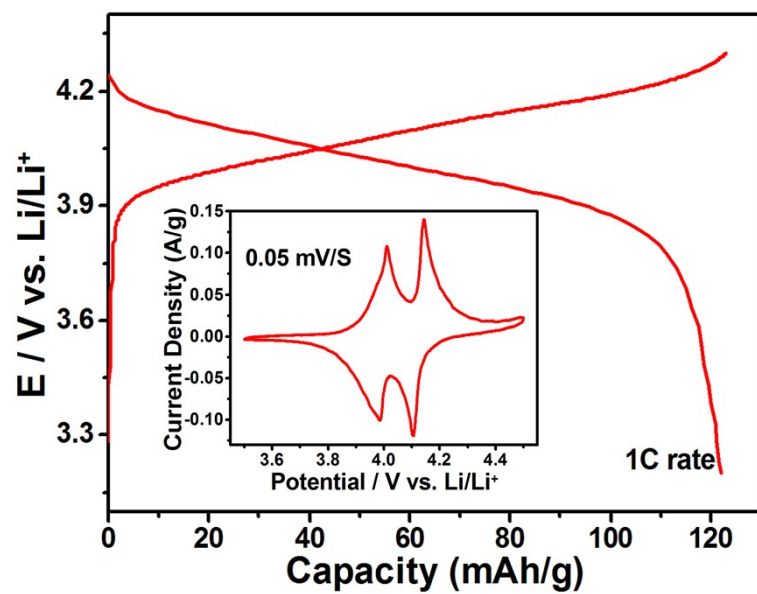

Fig. S3 Discharge curves of DS-LMO at different discharge rates of 1 C (140 mA g<sup>-1</sup>) to 55 C (7700 mA g<sup>-1</sup>).

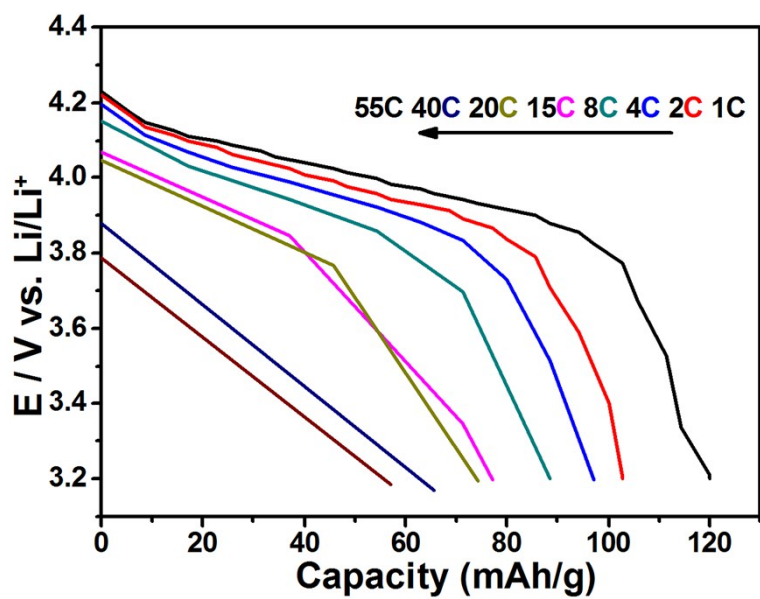

Fig. S4 Comparison of the rate capabilities of DS-LMO, LMO nanowires,<sup>27</sup> LMO nanotubes,<sup>28</sup> LMO microcubes<sup>29</sup> and LMO nanocones.<sup>34</sup>

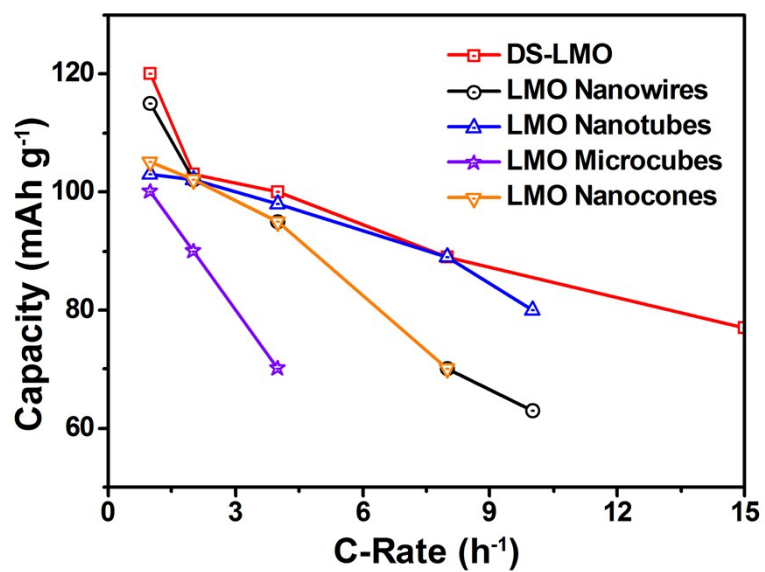

---

**Fig. S5** TEM image for DS-LMO after 500 cycles at discharge rates of 10 C.

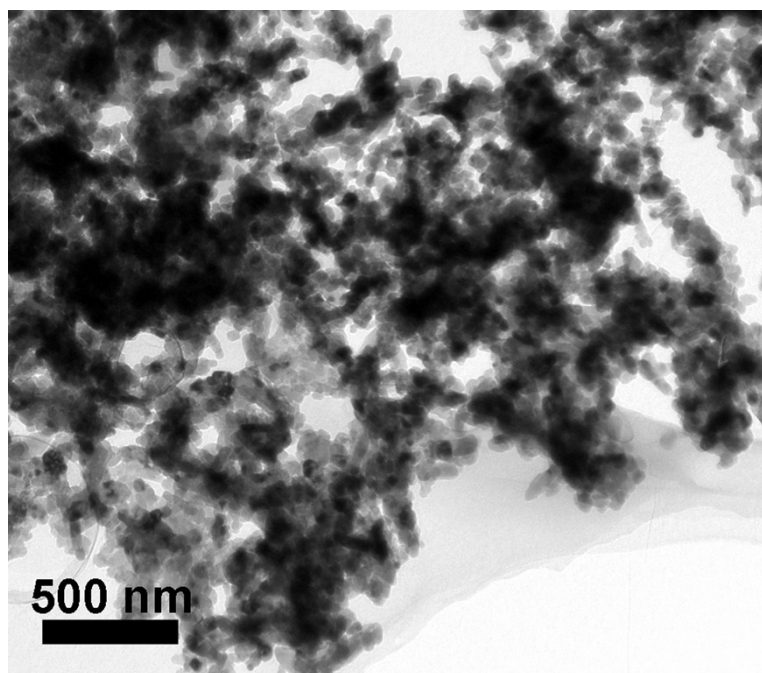

Supplement: c5ta00752f1.pdf [file c5ta00752f1.pdf]
